# Supplementary material for: Loss of non-coding RNA expression from the DLK1-DIO3 imprinted locus correlates with reduced neural differentiation potential in human embryonic stem cell lines
Source: PubMed Central journal article supplement (PMC4417332; doi:10.1186/scrt535), 2015-01-05
Supplement: 13287_2014_417_MOESM1_ESM.pdf [file 13287_2014_417_MOESM1_ESM.pdf]

**Table S1. Total primer sequences used in this study.**

| <b>Pimer name</b>  | <b>Sequence (5' to 3')</b>          |
|--------------------|-------------------------------------|
|                    | <i>For lncRNA or mRNA detection</i> |
| MEG3-F             | AAGGACCACCTCCTCTCCAT                |
| MEG3-R             | AGGAAACCGTGCTCCTAGTG                |
| MEG8-F             | TGTCGGAGGATCGTGTCAT                 |
| MEG8-R             | AATCTTCTAGAGCCCCAGATCC              |
| DLK1-F             | ACGATGGCCTCTATGAATGC                |
| DLK1-R             | GCAGAAATTGCCTGAGAAGC                |
| PAX6-F             | TCACCATGGCAAATAACCTG                |
| PAX6-R             | CAGCATGCAGGAGTATGAGG                |
| SOX17-F            | ACGCCGAGTTGAGCAAGA                  |
| SOX17-R            | TCTGCCTCCTCCACGAAG                  |
| HAND1-F            | TGCCTGAGAAAGAGAACCAG                |
| HAND1-R            | ATGGCAGGATGAACAAACAC                |
| SOX11-F            | GAGCTGAGCGAGATGATCG                 |
| SOX11-R            | GAACACCAGGTCGGAGAAGT                |
| RTN1-F             | GCAGAAAACCGACGAAGG                  |
| RTN1-R             | AGGCAGTCCGTGTACTTCTGA               |
| beta-III Tubulin-F | GCAACTACGTGGGCGACT                  |
| beta-III Tubulin-R | ATGGCTCGAGGCACGTACT                 |
| MAP2-F             | CGAACTTTATATTTTACCACTTCCTTG         |
| MAP2-R             | CCGTTTCATCTGCCATTCTTC               |
| GAPDH-F            | AGGGC TGCTT TTAAC TCTGG T           |
| GAPDH-R            | CCCCA CTTGA TTTTG GAGGG A           |
|                    | <i>For miRNA detection</i>          |
| miR-127-3p-F       | GGTCGGATCCGTCTGAGC                  |

|                          |                                                                |
|--------------------------|----------------------------------------------------------------|
| miR-127-3p-RT            | GTTGGCTCTGGTGCAGGGTCCGAGGTATTCGCACC<br>AGAGCCAACAGCCAA         |
| miR-154-F                | GCGCTAGGTTATCCGTGTTG                                           |
| miR-154-RT               | GTTGGCTCTGGTGCAGGGTCCGAGGTATTCGCACC<br>AGAGCCAACCGAAGG         |
| miR-376c-F               | GGGCGCAACATAGAGGAAATT                                          |
| miR-376c-RT              | GTTGGCTCTGGTGCAGGGTCCGAGGTATTCGCACC<br>AGAGCCAACACGTGG         |
| miR-494-F                | ACGTC ATGAA ACATA CACGG GA                                     |
| miR494-RT                | GTTGG CTCTG GTGCA GGGTC CGAGG TATTC<br>GCACC AGAGC CAACG AGGTT |
| miR-495-F                | GCGGAAACAAACATGGTGCA                                           |
| miR-495-RT               | GTTGGCTCTGGTGCAGGGTCCGAGGTATTCGCACC<br>AGAGCCAACAAGAAG         |
| miR-496-F                | ACGTC ATGAG TATTA CATGG CC                                     |
| miR-496-RT               | GTTGG CTCTG GTGCA GGGTC CGAGG TATTC<br>GCACC AGAGC CAACG AGATT |
| RNU48-F                  | AGTGATGATGACCCCAGGTAA                                          |
| RNU48-RT                 | GTTGGCTCTGGTGCAGGGTCCGAGGTATTCGCACC<br>AGAGCCAACGGTCAG         |
| Universal reverse primer | GTGCAGGGTCCGAGGT                                               |
|                          | <i>For bisulfite sequencing</i>                                |
| KvDMR-bi-F               | TGATGTGTTTATTATTTYGGG                                          |
| KvDMR-bi-R               | CCCTAAAATCCCAAATCCTC                                           |
| H19 DMR-bi-F             | TGTATAGTATATGGGTATTTTTGGAGGTTT                                 |
| H19 DMR-bi-R             | TCCTATAAATATCCTATTCCCAAATAACC                                  |
| IGDMR(CG4)-bi-F          | TTTTATTATTGAATTGGGTTTGTAGT                                     |
| IGDMR(CG4)-bi-R          | ACAATTCCTACTACAAAATTTCAACA                                     |
| MEG3 DMR(CG7)-bi-F       | TTGTGTTTGAATTTATTTTGT                                          |
| MEG3 DMR(CG7)-bi-R       | CCCAAATTCTATAACAAATTACT                                        |

|                 |                           |
|-----------------|---------------------------|
| PEG10 DMR-bi-F  | GTGTTATGTTTTATAAATAGATAAG |
| PEG10 DMR-bi- R | AACTCATATACCTCTACAATTC    |
