# Supplementary material for: Loss of non-coding RNA expression from the DLK1-DIO3 imprinted locus correlates with reduced neural differentiation potential in human embryonic stem cell lines
Source: PubMed Central journal article supplement (PMC4417332; doi:10.1186/scrt535), 2015-01-05
Supplement: 13287_2014_417_MOESM3_ESM.pdf [file 13287_2014_417_MOESM3_ESM.pdf]

**Table S2. microRNA profiles of the early and later passage hESCs**

Among the 800 miRNAs tested, *DLK1-DIO3* locus derived miRNAs are most dramatically silenced in prolonged cultured hESCs. The value of the two samples represents the counting frequency.

|    |                 | <b>sample 1</b>       | <b>sample 2</b>       |              |                               |
|----|-----------------|-----------------------|-----------------------|--------------|-------------------------------|
|    | <b>miRNA</b>    | <b>Early passages</b> | <b>Later passages</b> | <b>ratio</b> | <b><i>DLK1-DIO3</i> locus</b> |
| 1  | hsa-miR-409-3p  | 513.6                 | 0                     |              | Yes                           |
| 2  | hsa-miR-381     | 366.02                | 0                     |              | Yes                           |
| 3  | hsa-miR-323a-3p | 326.17                | 0                     |              | Yes                           |
| 4  | hsa-miR-411-5p  | 214.02                | 0                     |              | Yes                           |
| 5  | hsa-miR-487a    | 203.69                | 0                     |              | Yes                           |
| 6  | hsa-miR-431-5p  | 175.65                | 0                     |              | Yes                           |
| 7  | hsa-miR-487b    | 165.32                | 0                     |              | Yes                           |
| 8  | hsa-miR-370     | 72.34                 | 0                     |              | Yes                           |
| 9  | hsa-miR-409-5p  | 70.87                 | 0                     |              | Yes                           |
| 10 | hsa-miR-379-5p  | 165.32                | 4.63                  | 35.70626     | Yes                           |
| 11 | hsa-miR-376c    | 816.13                | 22.95                 | 35.56122     | Yes                           |
| 12 | hsa-miR-136-5p  | 398.49                | 12.48                 | 31.93029     | Yes                           |
| 13 | hsa-miR-127-3p  | 520.98                | 17.72                 | 29.40068     | Yes                           |
| 14 | hsa-miR-210     | 26.59                 | 0                     |              | No                            |
| 15 | hsa-miR-543     | 301.09                | 12.48                 | 24.1258      | Yes                           |
| 16 | hsa-miR-485-3p  | 299.61                | 12.48                 | 24.00721     | Yes                           |
| 17 | hsa-miR-495     | 662.65                | 28.19                 | 23.50656     | Yes                           |
| 18 | hsa-miR-376a-3p | 1914.1                | 101.47                | 18.8637      | Yes                           |
| 19 | hsa-miR-376b    | 289.28                | 17.72                 | 16.32506     | Yes                           |
| 20 | hsa-miR-377-3p  | 236.15                | 15.1                  | 15.63907     | Yes                           |
| 21 | hsa-miR-154-5p  | 14.79                 | 0                     |              | Yes                           |
| 22 | hsa-miR-337-5p  | 522.45                | 41.27                 | 12.65932     | Yes                           |
| 23 | hsa-miR-337-3p  | 311.42                | 25.57                 | 12.17912     | Yes                           |
| 24 | hsa-miR-410     | 274.52                | 22.95                 | 11.96166     | Yes                           |
| 25 | hsa-miR-758     | 94.48                 | 9.87                  | 9.572442     | Yes                           |
| 26 | hsa-miR-299-5p  | 134.32                | 15.1                  | 8.895364     | Yes                           |

|    |                 |        |         |          |     |
|----|-----------------|--------|---------|----------|-----|
| 27 | hsa-miR-127-5p  | 7.41   | 0       |          | Yes |
| 28 | hsa-miR-433     | 32.5   | 4.63    | 7.019438 | Yes |
| 29 | hsa-miR-654-3p  | 28.07  | 4.63    | 6.062635 | Yes |
| 30 | hsa-miR-656     | 87.1   | 15.1    | 5.768212 | Yes |
| 31 | hsa-miR-382-5p  | 205.16 | 43.89   | 4.674413 | Yes |
| 32 | hsa-miR-432-5p  | 191.88 | 41.27   | 4.649382 | Yes |
| 33 | hsa-miR-496     | 8.88   | 2.02    | 4.39604  | Yes |
| 34 | hsa-miR-889     | 42.83  | 15.1    | 2.836424 | Yes |
| 35 | hsa-miR-299-3p  | 175.65 | 70.06   | 2.507137 | Yes |
| 36 | hsa-miR-329     | 32.5   | 15.1    | 2.152318 | Yes |
| 37 | hsa-miR-125b-5p | 978.47 | 593.49  | 1.648671 | No  |
| 38 | hsa-miR-935     | 1.51   | 0       |          | Yes |
| 39 | hsa-miR-494     | 433.91 | 321.31  | 1.35044  | Yes |
| 40 | hsa-miR-188-5p  | 19.21  | 15.1    | 1.272185 | No  |
| 41 | hsa-miR-340-5p  | 48.73  | 38.66   | 1.260476 | No  |
| 42 | hsa-miR-27b-3p  | 113.66 | 91      | 1.249011 | No  |
| 43 | hsa-miR-361-3p  | 11.84  | 9.87    | 1.199595 | No  |
| 44 | hsa-miR-335-5p  | 113.66 | 96.23   | 1.181129 | No  |
| 45 | hsa-miR-24-3p   | 94.48  | 80.53   | 1.173227 | No  |
| 46 | hsa-miR-342-3p  | 109.24 | 93.62   | 1.166845 | No  |
| 47 | ACTB            | 1707.5 | 1499.03 | 1.13907  | No  |
