# Supplementary material for: Loss of non-coding RNA expression from the DLK1-DIO3 imprinted locus correlates with reduced neural differentiation potential in human embryonic stem cell lines
Source: PubMed Central journal article supplement (PMC4417332; doi:10.1186/scrt535), 2015-01-05
Supplement: 13287_2014_417_MOESM4_ESM.pdf [file 13287_2014_417_MOESM4_ESM.pdf]

## Figure S2

A

### GSEA for the correlation of MEG3 groups and ES sets

Table: GSEA Results Summary

|                                   |                                       |
|-----------------------------------|---------------------------------------|
| Dataset                           | all gene.class.cls#MEG3up_vs_MEG3down |
| Phenotype                         | class.cls#MEG3up_vs_MEG3down          |
| Upregulated in class              | MEG3down                              |
| GeneSet                           | BENPORATH_ES_1                        |
| Enrichment Score (ES)             | -0.3435752                            |
| Normalized Enrichment Score (NES) | -1.030656                             |
| Nominal p-value                   | 0.36567163                            |
| FDR q-value                       | 0.38619402                            |
| FWER p-Value                      | 0.196                                 |

Table: GSEA Results Summary

|                                   |                                       |
|-----------------------------------|---------------------------------------|
| Dataset                           | all gene.class.cls#MEG3up_vs_MEG3down |
| Phenotype                         | class.cls#MEG3up_vs_MEG3down          |
| Upregulated in class              | MEG3down                              |
| GeneSet                           | BENPORATH_ES_2                        |
| Enrichment Score (ES)             | -0.43608865                           |
| Normalized Enrichment Score (NES) | -1.1982368                            |
| Nominal p-value                   | 0.13369964                            |
| FDR q-value                       | 0.14468865                            |
| FWER p-Value                      | 0.073                                 |

B

### Model-Based Multi-Class Pluripotency Score

pluripotency

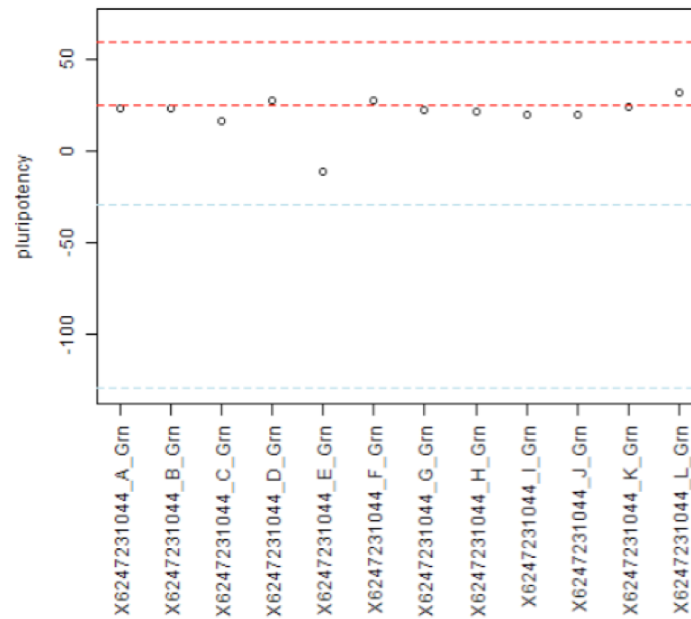

**Figure S2. No significant difference in pluripotency-associated gene expression was observed between *MEG3*-ON and *MEG3*-OFF hESCs.**

(A) No significant differences in pluripotency-related gene expression were found based on Gene Set Enrichment Analysis (GSEA).

(B) No significant differences in pluripotency-related gene expression were found based on “PluriTest”. Samples A-D consisted of *MEG3*-ON undifferentiated hESCs, sample E consisted of *MEG3*-ON hESC-differentiated EBs, and samples F-L consisted of undifferentiated *MEG3*-OFF hESCs. Samples A-J were derived from the NTU1 hESC line; samples K-L were derived from the H9 hESC line. The area between the red lines indicates the range containing approximately 95 percent of the tested pluripotent samples. The blue lines indicate the scores observed in approximately 95 percent of the non-pluripotent samples from other studies.
