# Supplementary material for: Loss of non-coding RNA expression from the DLK1-DIO3 imprinted locus correlates with reduced neural differentiation potential in human embryonic stem cell lines
Source: PubMed Central journal article supplement (PMC4417332; doi:10.1186/scrt535), 2015-01-05
Supplement: 13287_2014_417_MOESM5_ESM.pdf [file 13287_2014_417_MOESM5_ESM.pdf]

## Figure S3

### *MEG3* associated genes vs. PRC2 targets vs. Neural Progenitor Markers

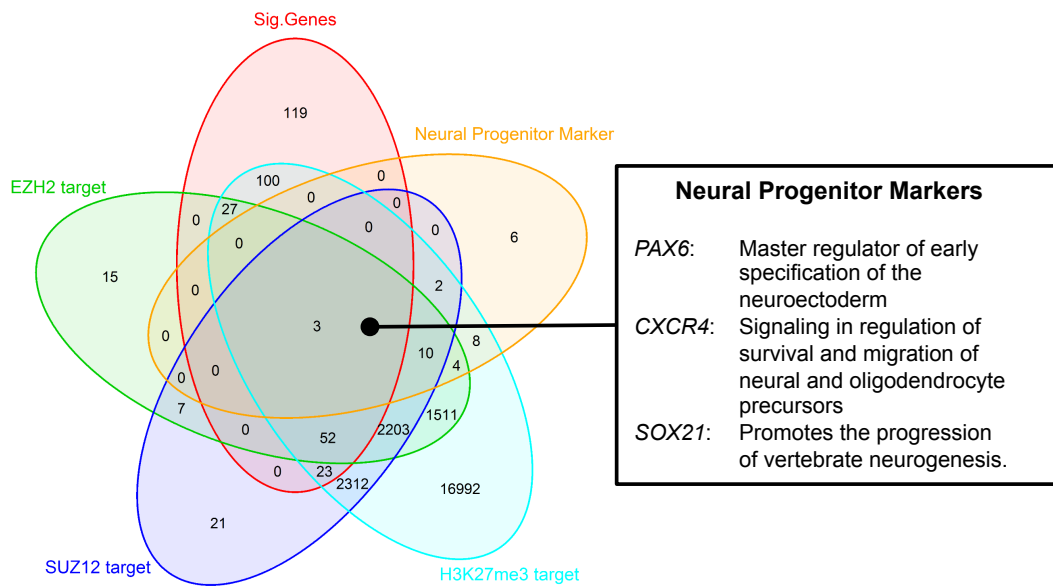

**Figure S3. *MEG3* may affect the expression of certain PRC2 target genes, including neural-lineage-related genes.**

Significantly differentially expressed genes were identified through significance analysis of microarray (SAM) between *MEG3*-ON and *MEG3*-OFF hESCs (described as Sig. genes in red). *PAX6*, *CXCR4* and *SOX21* genes were identified among the overlapping clusters of the Sig. genes, EZH2 target genes (GSM327665, GSM831028), SUZ12 target genes (GSM831042, GSM935352), H3K27me3 enriched genes (GSM327663) and neural progenitor markers.
