# Supplementary material for: Loss of non-coding RNA expression from the DLK1-DIO3 imprinted locus correlates with reduced neural differentiation potential in human embryonic stem cell lines
Source: PubMed Central journal article supplement (PMC4417332; doi:10.1186/scrt535), 2015-01-05
Supplement: 13287_2014_417_MOESM7_ESM.pdf [file 13287_2014_417_MOESM7_ESM.pdf]

**Figure S5**

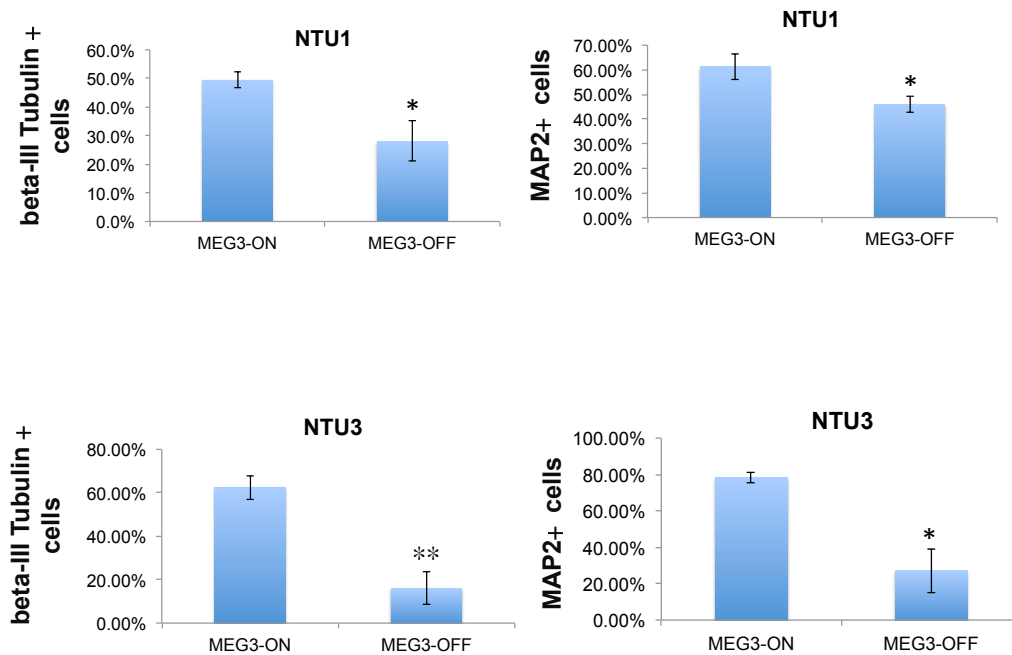

**Figure S5. Quantitation of beta-III Tubulin or MAP2 positive cells after differentiation from the *MEG3*-ON and *MEG3*-OFF hESCs.**

The percentage of beta-III Tubulin positive or MAP2 positive cells differentiated from the NTU1 and NTU3 *MEG3*-OFF hESCs was significantly lower than those from the *MEG3*-ON hESCs. Error bars represent the SEM generated from 2 biological samples with 3 technical repeats each. \* $P < 0.05$ , \*\*  $P < 0.01$  compared with the corresponding *MEG3*-ON groups by Student's *t*-test.
