# Supplementary material for: Loss of non-coding RNA expression from the DLK1-DIO3 imprinted locus correlates with reduced neural differentiation potential in human embryonic stem cell lines
Source: PubMed Central journal article supplement (PMC4417332; doi:10.1186/scrt535), 2015-01-05
Supplement: 13287_2014_417_MOESM8_ESM.pdf [file 13287_2014_417_MOESM8_ESM.pdf]

**Figure S6**

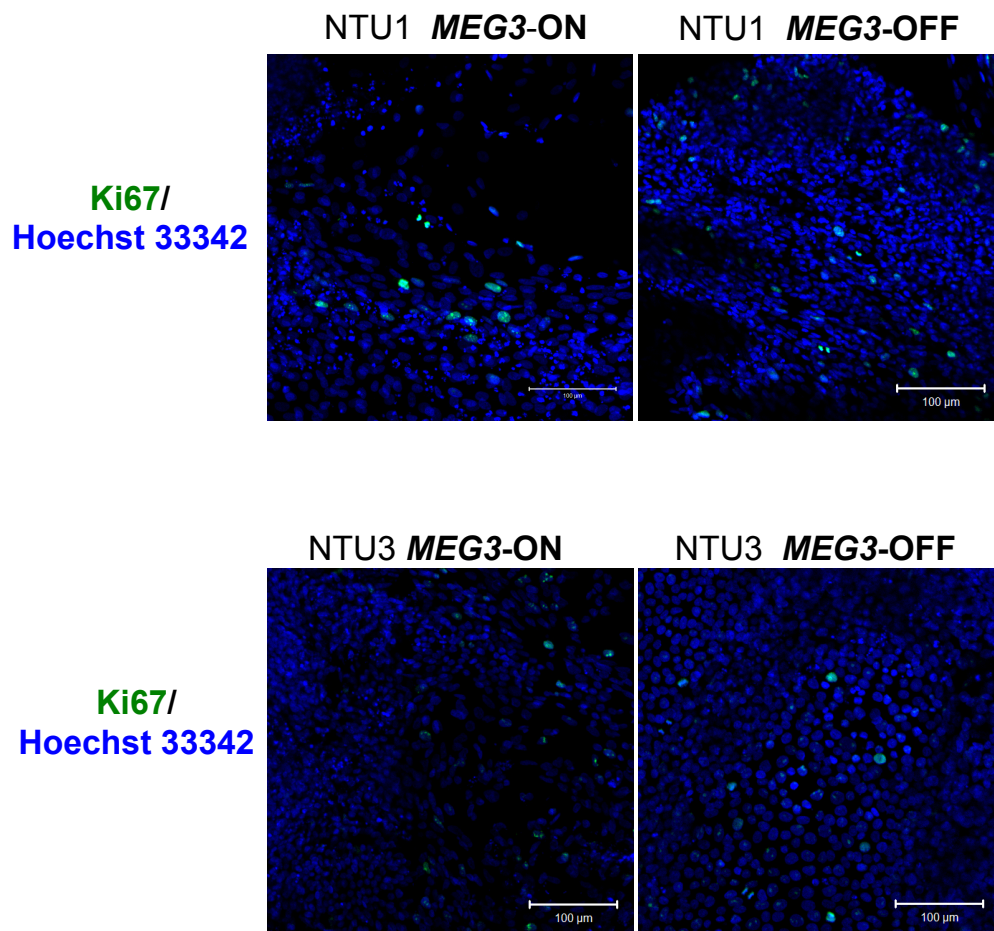

**Figure S6. Ki67 staining for the *MEG3-ON* and *MEG3-OFF* hESC-differentiated neural lineage-like cells after 18 days on Matrigel.**

The numbers of Ki67 positive-stained cells were not obviously different between the *MEG3-ON* and *MEG3-OFF* hESC-differentiated cells, suggesting those observed differentiation defects seemed not linked to the change in cellular proliferation. Scale bars, 100 μm.
